# Supplementary material for: Green synthesis of peptide-templated fluorescent copper nanoclusters for temperature sensing and cellular imaging
Source: Royal Society of Chemistry journal article supplement (doi:10.1039/c4an01757a), 2014-01-01
Supplement: c4an01757a1.pdf [file c4an01757a1.pdf]

## Supporting Information

### **Green synthesis of peptide-templated fluorescent copper nanoclusters for temperature sensing and cellular imaging**

Hong Huang, Hua Li, Ai-Jun Wang,\* Shu-Xian Zhong, Ke-Ming Fang, Jiu-Ju Feng\*

*College of Geography and Environmental Science, College of Chemistry and Life Science,*

*Zhejiang Normal University, Jinhua 321004, China*

\*Corresponding author: *E-mail:* [ajwang@zjnu.cn](mailto:ajwang@zjnu.cn)(AJW); *E-mail:* [jjfeng@zjnu.cn](mailto:jjfeng@zjnu.cn)(JJF), Tel. /Fax:

+86 579 82282269.

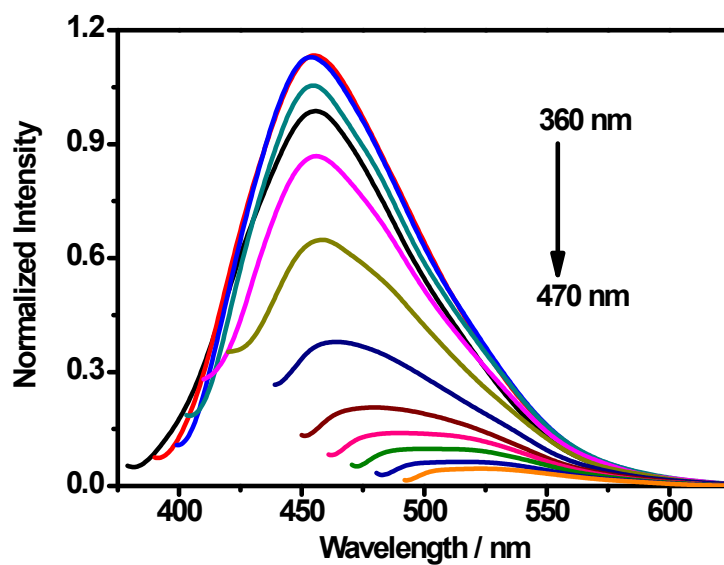

**Figure S1** Fluorescence emission spectra of Cu NCs obtained by different excitation wavelength and excitation from 360 to 470 nm with 10 nm increment.

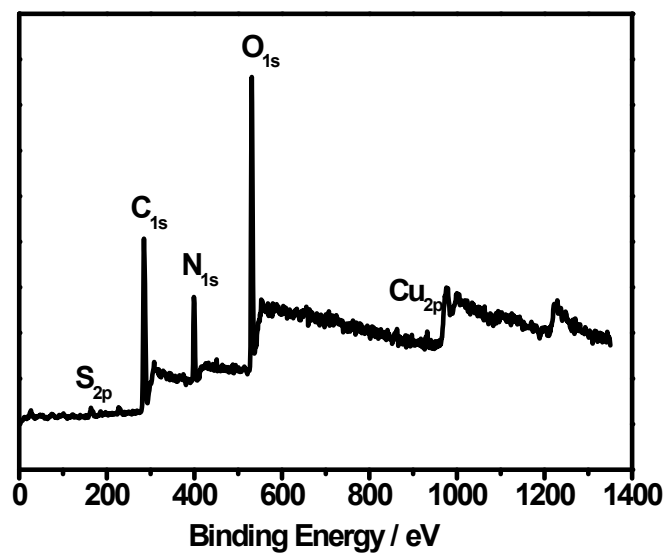

**Figure S2** XPS survey spectrum of Cu NCs.

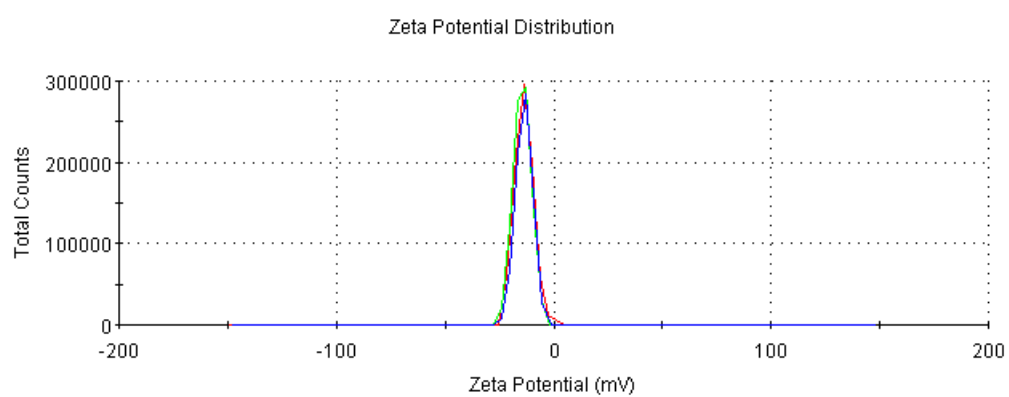

**Figure S3** Zeta potential measurements of Cu NCs.
